# Supplementary material
Source: Springer Nature journal article supplement (https://www.springermedizin.de/resource/supplementary/13000_2012_686_MOESM3_ESM.pdf/9624872)
Supplement: MOESM3 [file 9624872]

**a**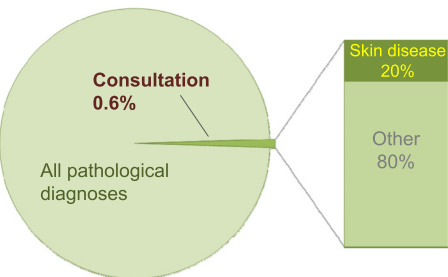**b**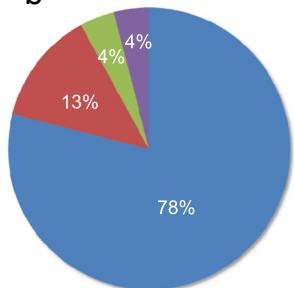

■ No problems

■ Could use after becoming more familiar with the system

■ Hard to say

■ Other

**c**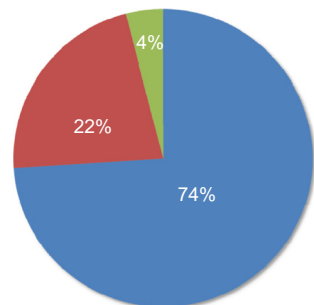

■ No problems

■ Convenient for diagnosis, but still some problems

■ Problems with diagnosis

**d**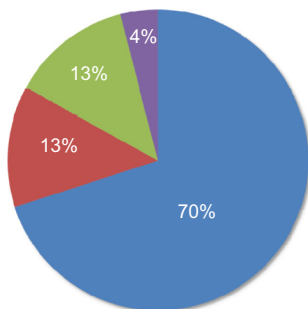

■ Would like to use

■ Don't know

■ Other

■ Would not like to use
